# Supplementary material
Source: Copernicus journal article supplement (doi:10.5194/tc-20-2017-2026)
Supplement: Supplementary file 1 [file tc-20-2017-2026-supplement.pdf]

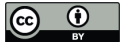

*Supplement of*

## **Effects of disturbance on seasonal CO<sub>2</sub> dynamics in two boreal forest sites underlain by permafrost**

**Dragos A. Vas et al.**

*Correspondence to:* Dragos A. Vas ([dragos.a.vas@usace.army.mil](mailto:dragos.a.vas@usace.army.mil))

The copyright of individual parts of the supplement might differ from the article licence.

**Table S1.** Soil texture, measured for each plot (i.e. LiCor chamber). Texture was measured via hydrometer method at the University of Wisconsin Soil and Forage Lab. These results represent composite samples across sampling dates (20g dry soil from each date: Sept\_2022 + Jun\_2023 + Feb\_2023) for each chamber and soil layer.

| <b>Chamber</b> | <b>Disturbance</b> | <b>Soil layer</b> | <b>Sand, %</b> | <b>Silt, %</b> | <b>Clay, %</b> | <b>Texture Class</b> |
|----------------|--------------------|-------------------|----------------|----------------|----------------|----------------------|
| 1              | Undisturbed        | Subsoil           | 43             | 50             | 7              | Silt loam            |
| 2              | Undisturbed        | Subsoil           | 39             | 52             | 9              | Silt loam            |
| 3              | Undisturbed        | Subsoil           | 31             | 60             | 9              | Silt loam            |
| 4              | Undisturbed        | Subsoil           | 29             | 60             | 11             | Silt loam            |
| 1              | Undisturbed        | Topsoil           | 41             | 48             | 11             | Loam                 |
| 2              | Undisturbed        | Topsoil           | 45             | 46             | 9              | Loam                 |
| 3              | Undisturbed        | Topsoil           | 29             | 60             | 11             | Silt loam            |
| 4              | Undisturbed        | Topsoil           | 45             | 46             | 9              | Loam                 |
| 5              | Disturbed          | Subsoil           | 31             | 58             | 11             | Silt loam            |
| 6              | Disturbed          | Subsoil           | 37             | 54             | 9              | Silt loam            |
| 7              | Disturbed          | Subsoil           | 25             | 62             | 13             | Silt loam            |
| 8              | Disturbed          | Subsoil           | 25             | 66             | 9              | Silt loam            |
| 5              | Disturbed          | Topsoil           | 45             | 48             | 7              | Loam                 |
| 6              | Disturbed          | Topsoil           | 53             | 40             | 7              | Sandy loam           |
| 7              | Disturbed          | Topsoil           | 37             | 50             | 13             | Silt loam            |
| 8              | Disturbed          | Topsoil           | 41             | 50             | 9              | Silt loam            |

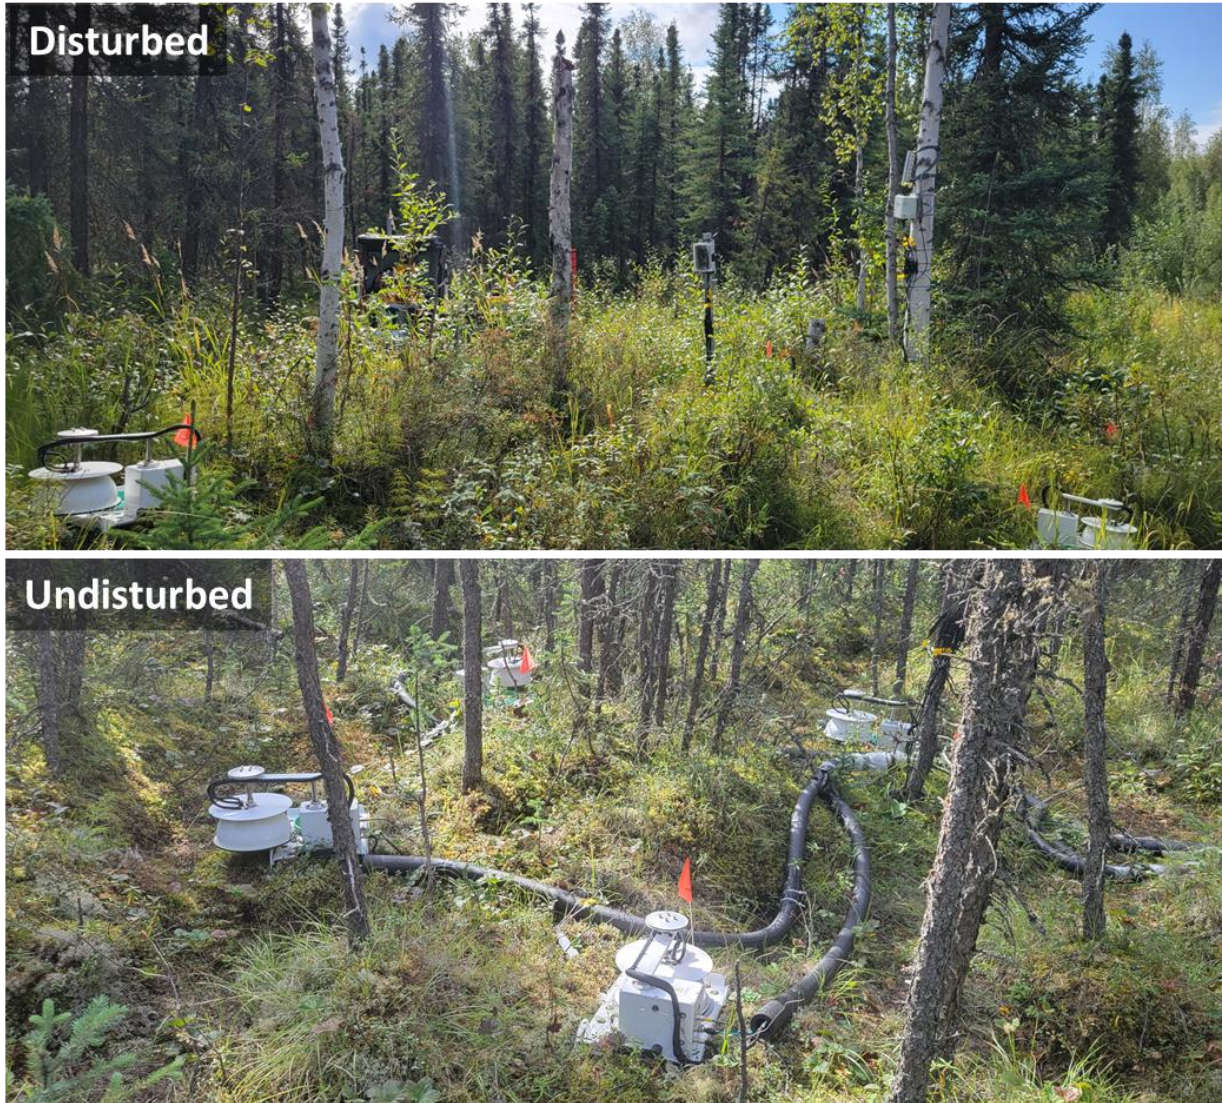

**Figure S1.** Photographs of study locations: undisturbed (bottom) and disturbed (top). These images were captured during the site visit on 13 August 2024. A total of eight long-term chambers were installed: four at the undisturbed location and four at the disturbed location. Owing to the dense vegetation, only two chambers are discernible at the disturbed site in this figure.

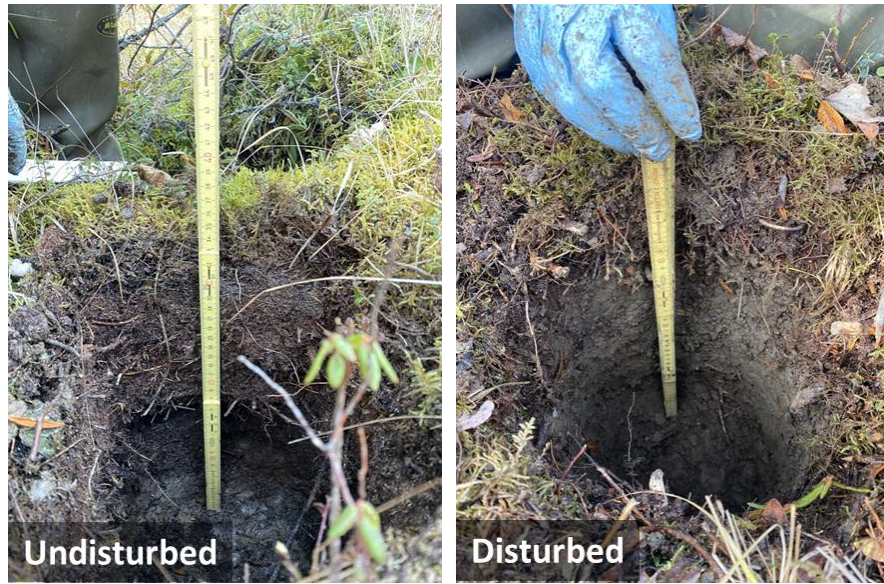

**Figure S2.** Undisturbed (left) and disturbed (right) photos of the shallow soil layers. The photos were taken during the initial soil sampling and soil moisture and temperature probe installation on 23 September 2022.

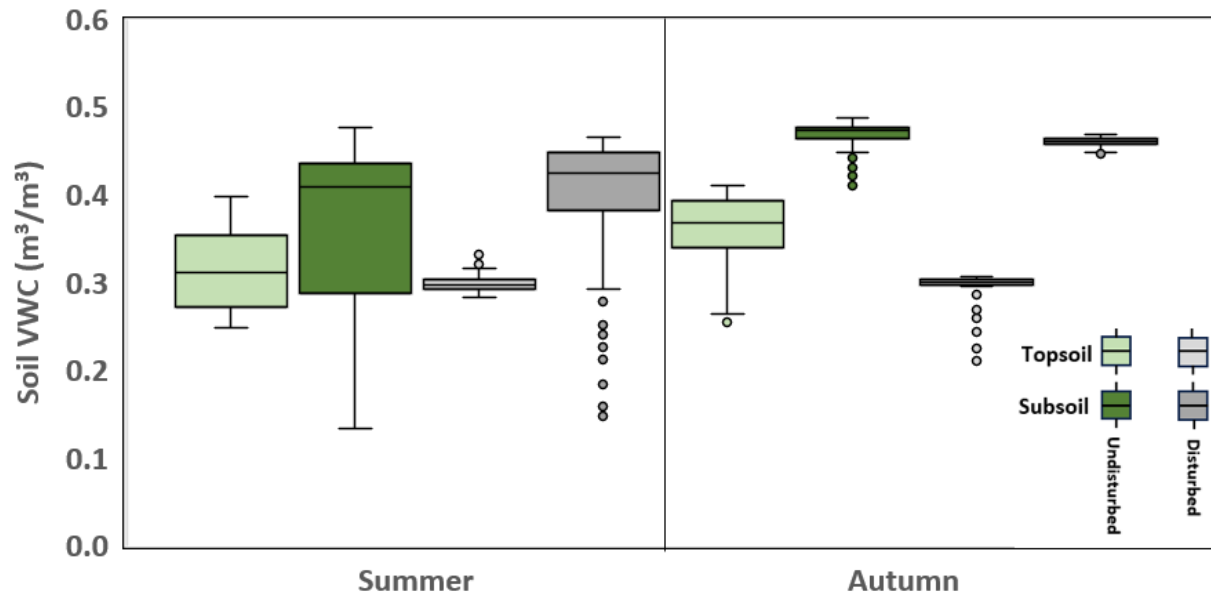

**Figure S3.** Summer and autumn soil VWC patterns. VWC measurements were restricted to the summer (Jun–Aug) and autumn (Sep and Oct) seasons due to the sensors' operational constraints, which required temperatures to remain above freezing. Soil VWC are average daily values from the topsoil and subsoil layers at the 8 chamber plots: 4 at the undisturbed site and 4 at the disturbed site. The boxplot range indicates the first and third quartiles; the middle line denotes the median. Box whiskers indicate minimum and maximum values, excluding outliers indicated by circles.

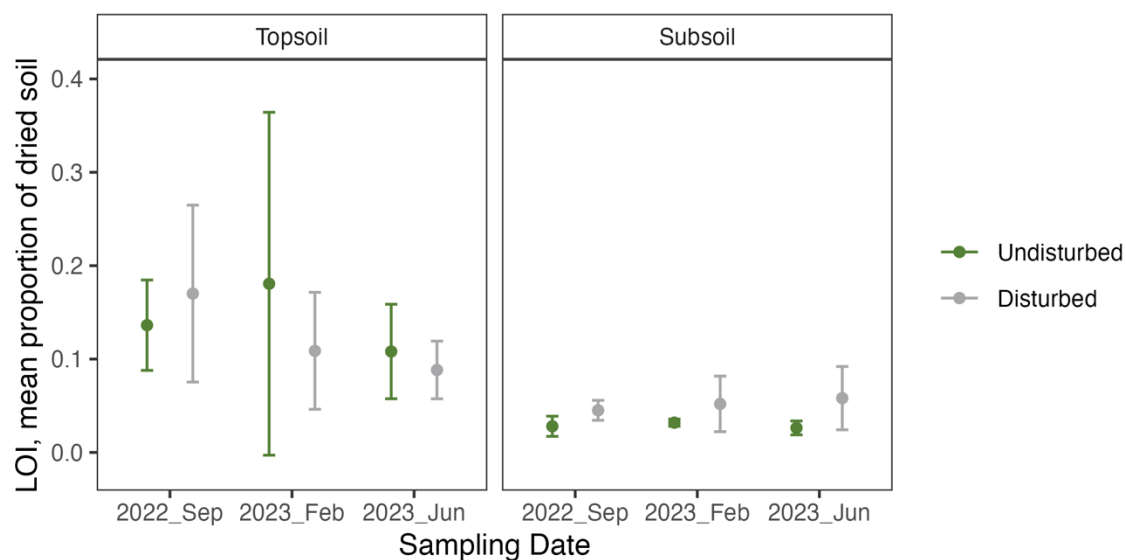

**Figure S4.** Loss on ignition (LOI), a proxy for soil organic matter content) by disturbance treatment and sampling date, faceted by soil layer. Error bars are 95% confidence intervals ( $1.96 \times$  standard error).

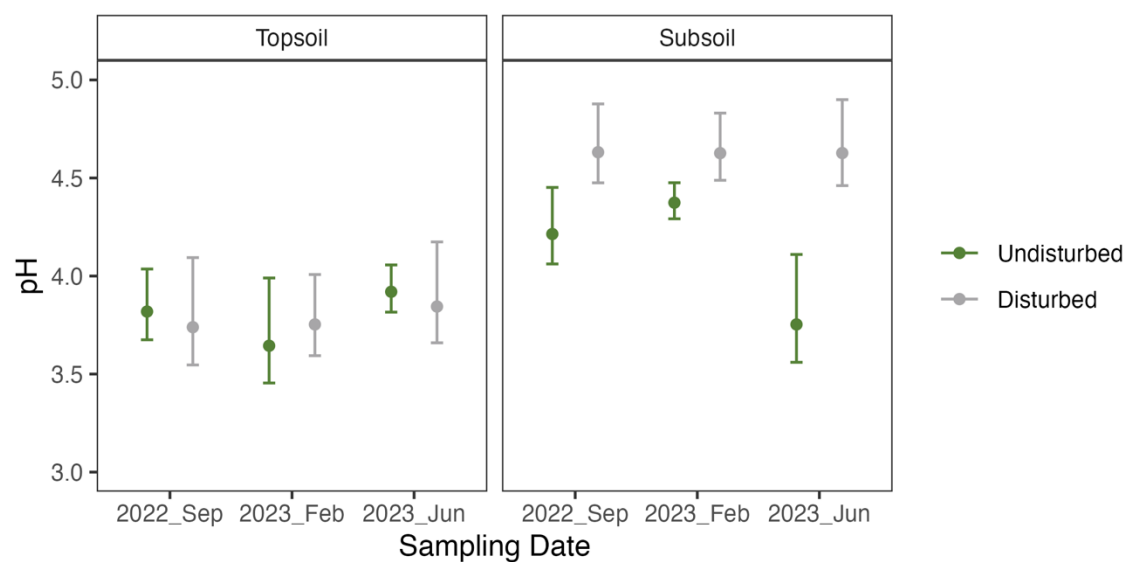

**Figure S5.** Soil pH, by disturbance and sampling date, faceted by soil layer. pH was significantly higher in the subsoil layer for the disturbed treatment compared to the undisturbed treatment ( $p < 0.01$ ; ANOVA). Error bars are standard error.

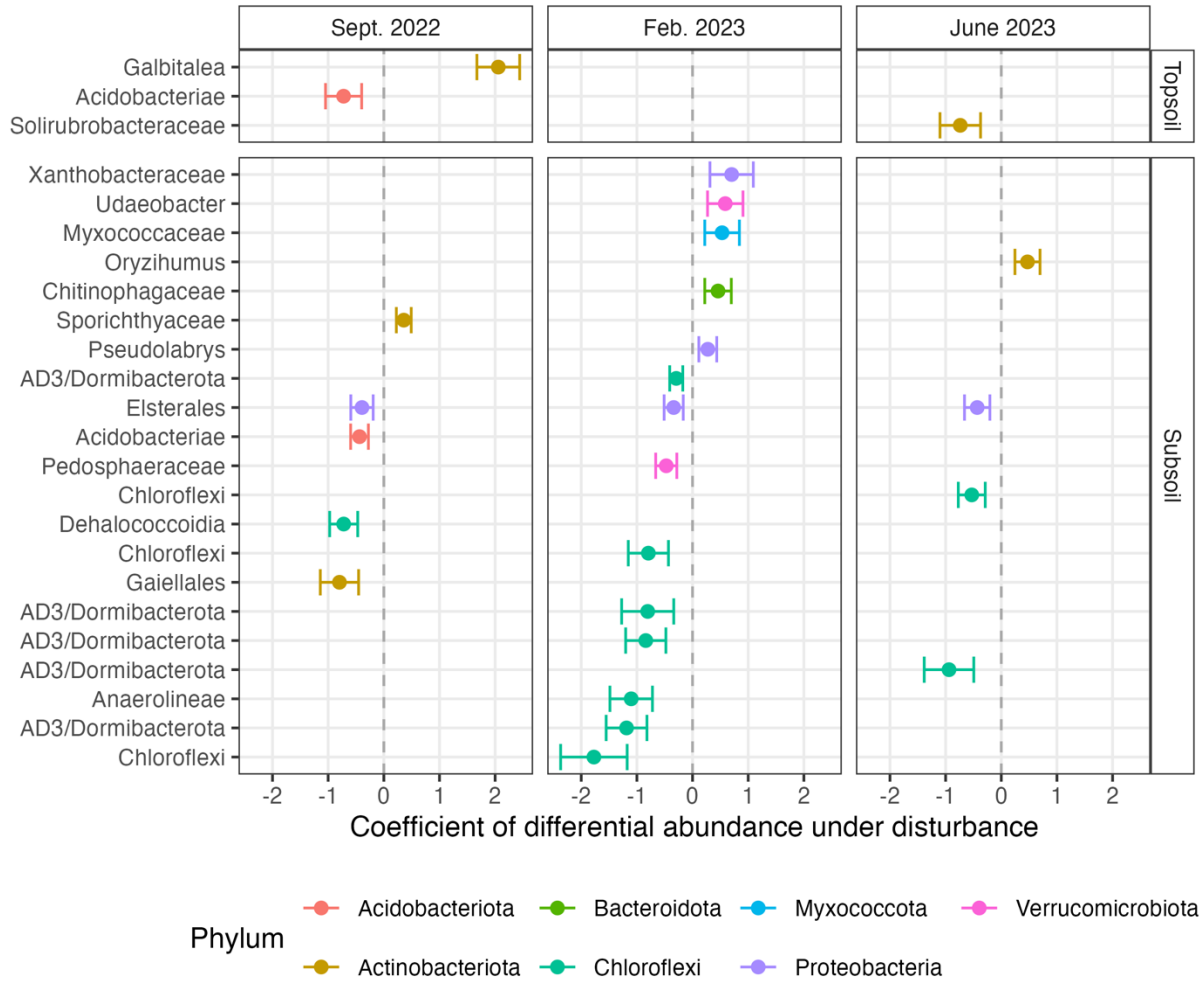

**Figure S6.** Differentially abundant bacterial taxa for disturbed (vs. undisturbed) plots, within sampling date and subsoil vs. topsoil layers. The x-axis is the coefficient of differential abundance; positive coefficients denote enrichment whereas negative coefficients denote depletion. Each point represents a single ASV, colored by phylum, and labelled on the y-axis with the finest available taxonomy; thus—there may be more than one ASV definable to the same name and level of taxonomy. Error bars represent  $\pm 1.96$  SE.

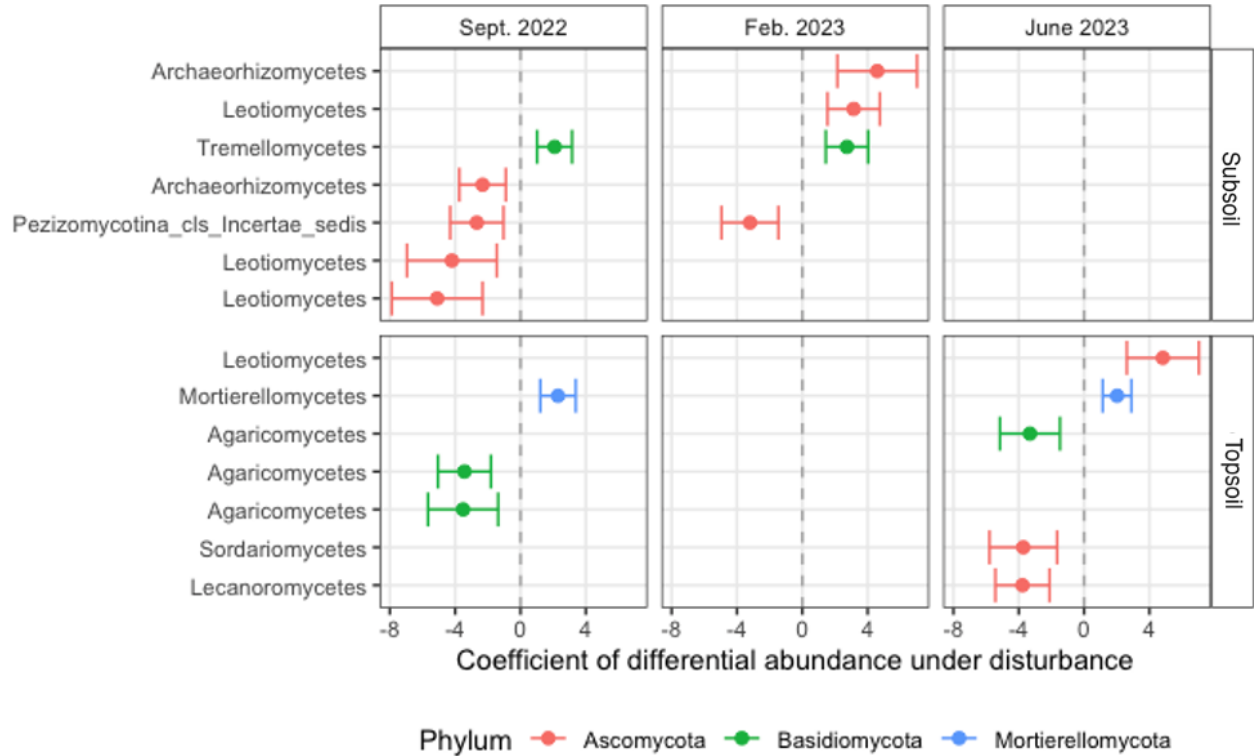

**Figure S7.** Differentially abundant fungal taxa for disturbed (vs. undisturbed) plots, within sampling date and subsoil vs. topsoil layers. The x-axis is the coefficient of differential abundance; positive coefficients denote enrichment whereas negative coefficients denote depletion. Each point represents a single ASV, colored by phylum, and labelled on the y-axis by taxonomic class. The same class name may be repeated for different ASVs of that same class. Error bars represent  $\pm 1.96$  SE.

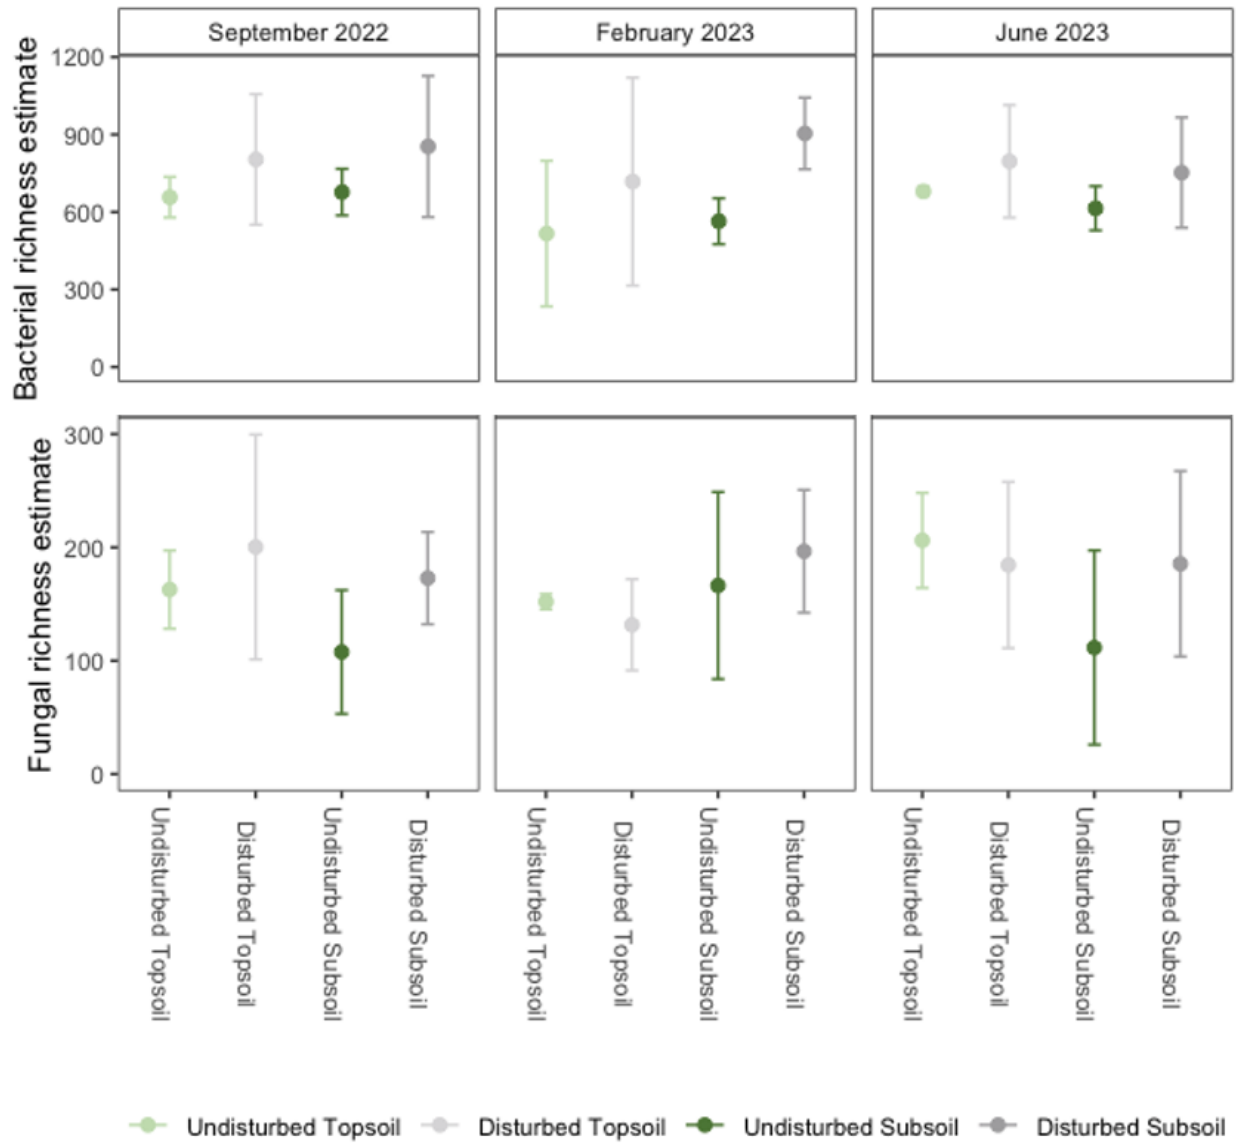

**Figure S8.** ASV richness estimates across disturbance regimes, soil layers, and sampling dates. Richness was estimated using the weighted linear regression model of OTU richness estimates, which weights observations based on variance. Error bars represent  $\pm 1.96$  SE.

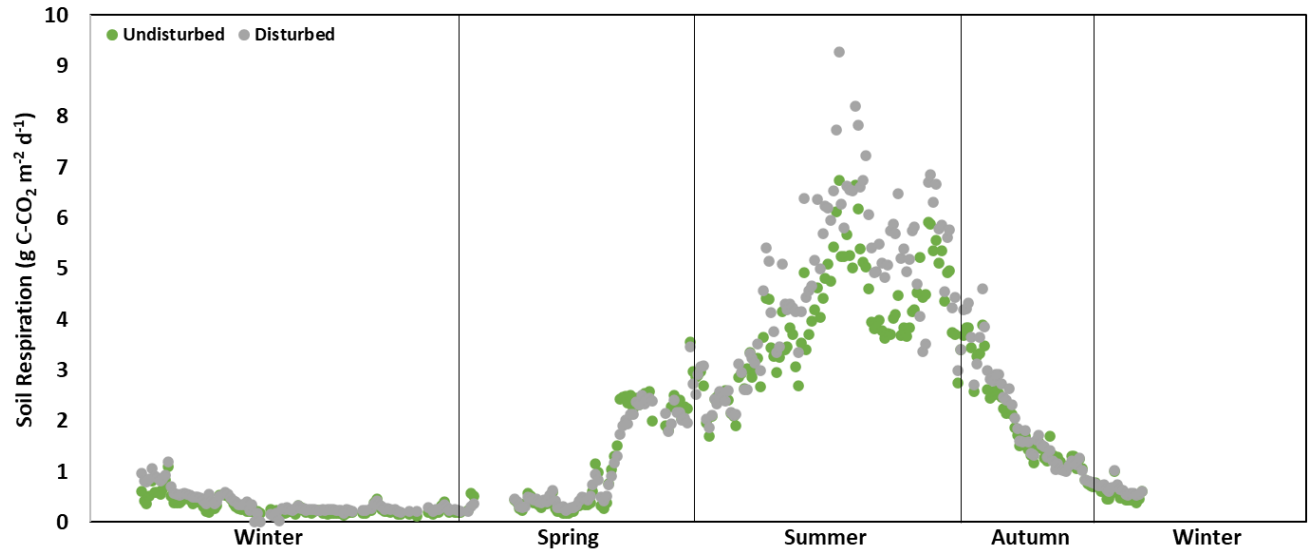

**Figure S9.** Soil respiration fluxes at the undisturbed and disturbed sites from 4 Nov 2022 to 9 Nov 2023. Soil respiration emissions are average daily fluxes from the 8 long-term chambers: 4 at undisturbed site and 4 at disturbed site.
